# Supplementary material
Source: PubMed Central journal article supplement (PMC3608818)

# Suppl. Figure 1

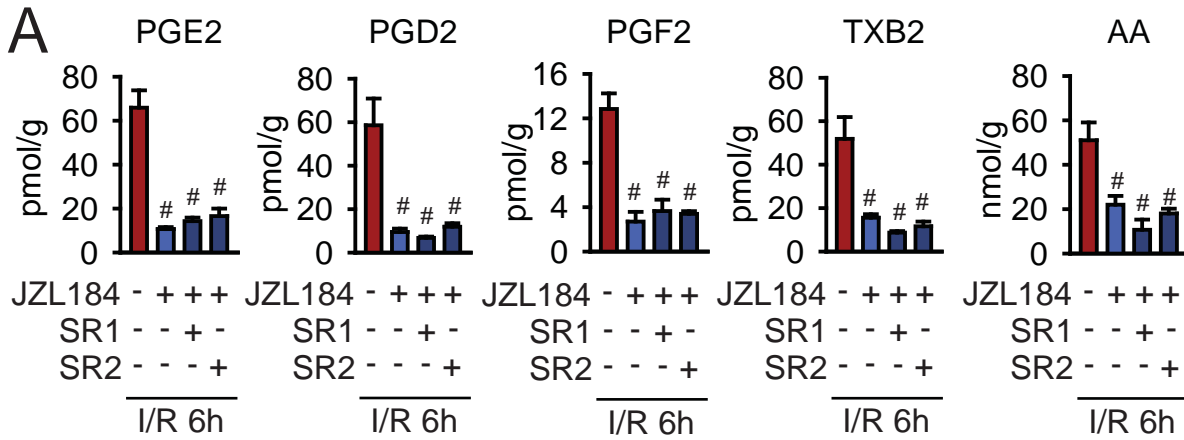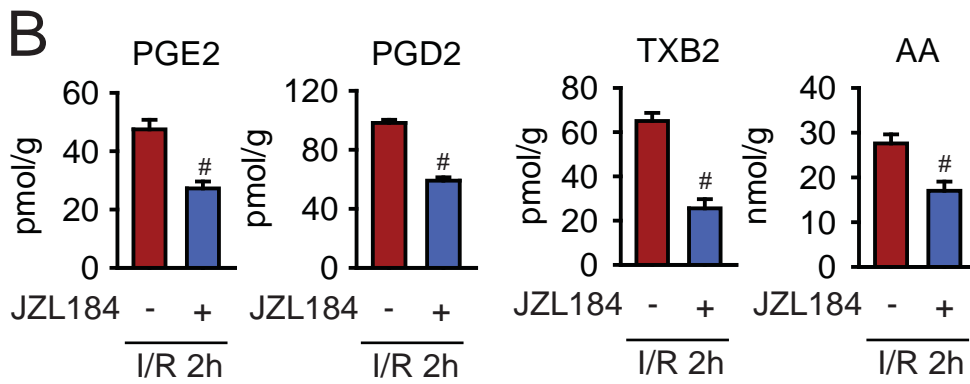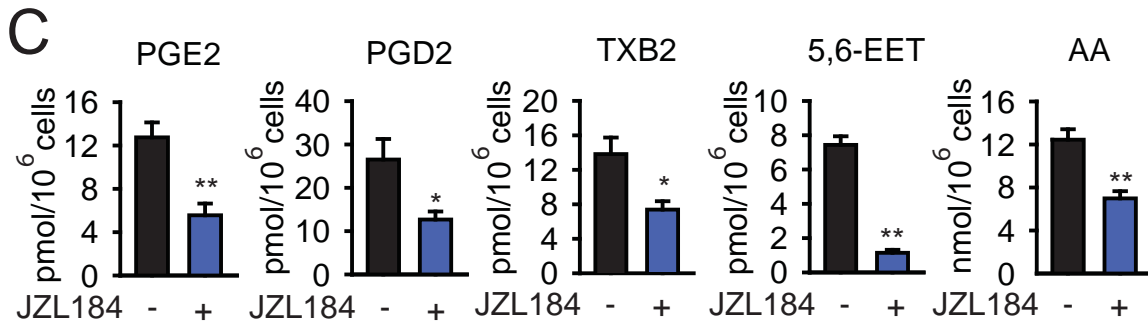

# Suppl. Figure 2

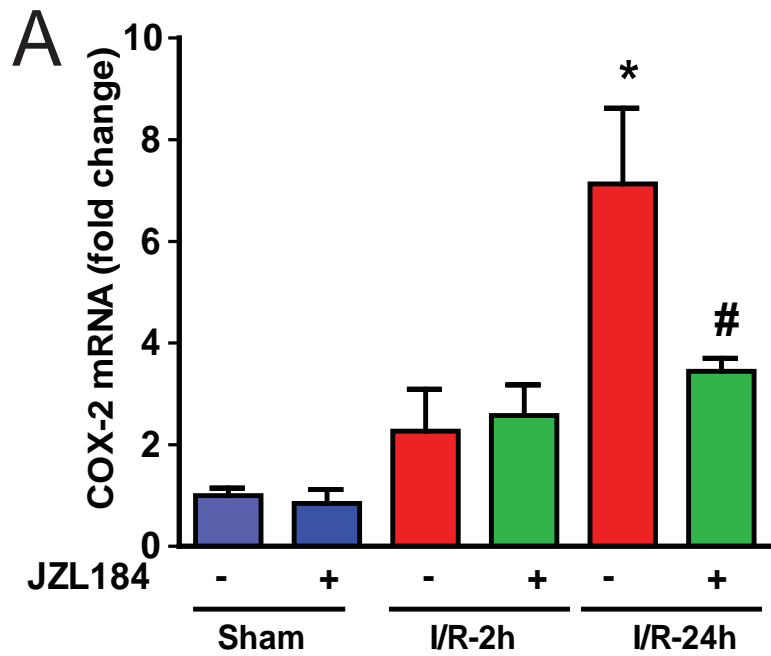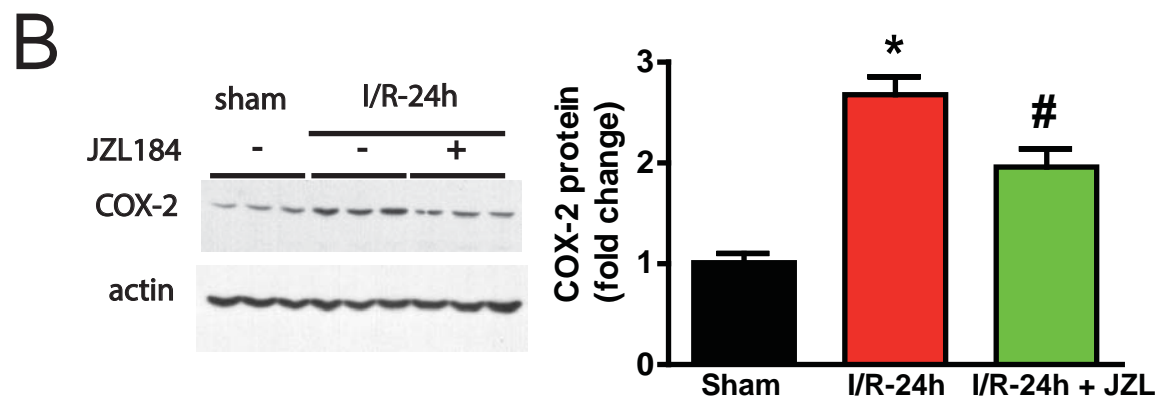

# Suppl. Figure 3

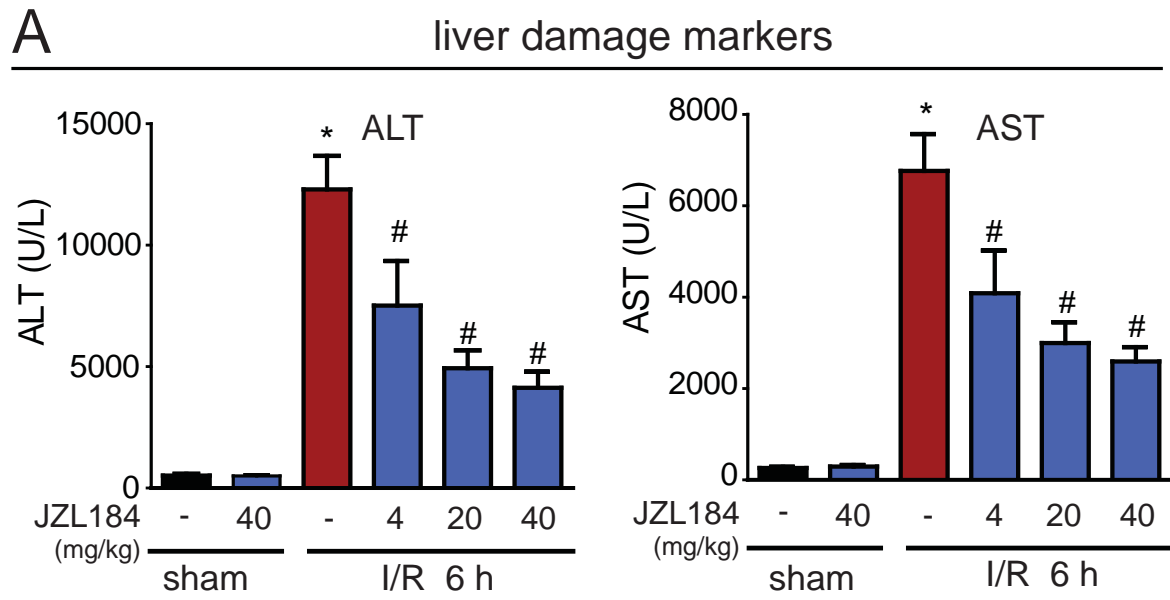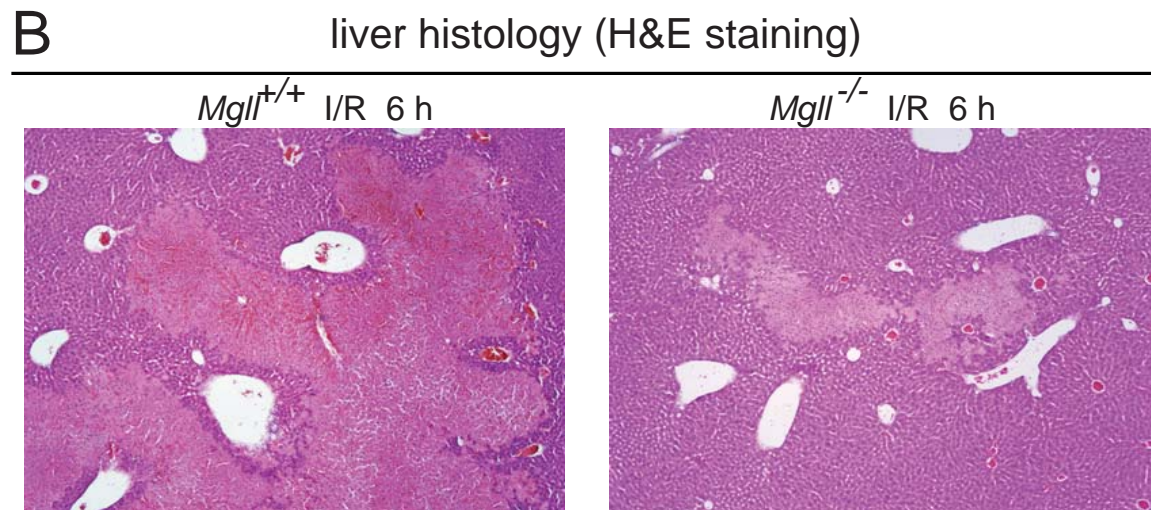

# Suppl. Figure 4

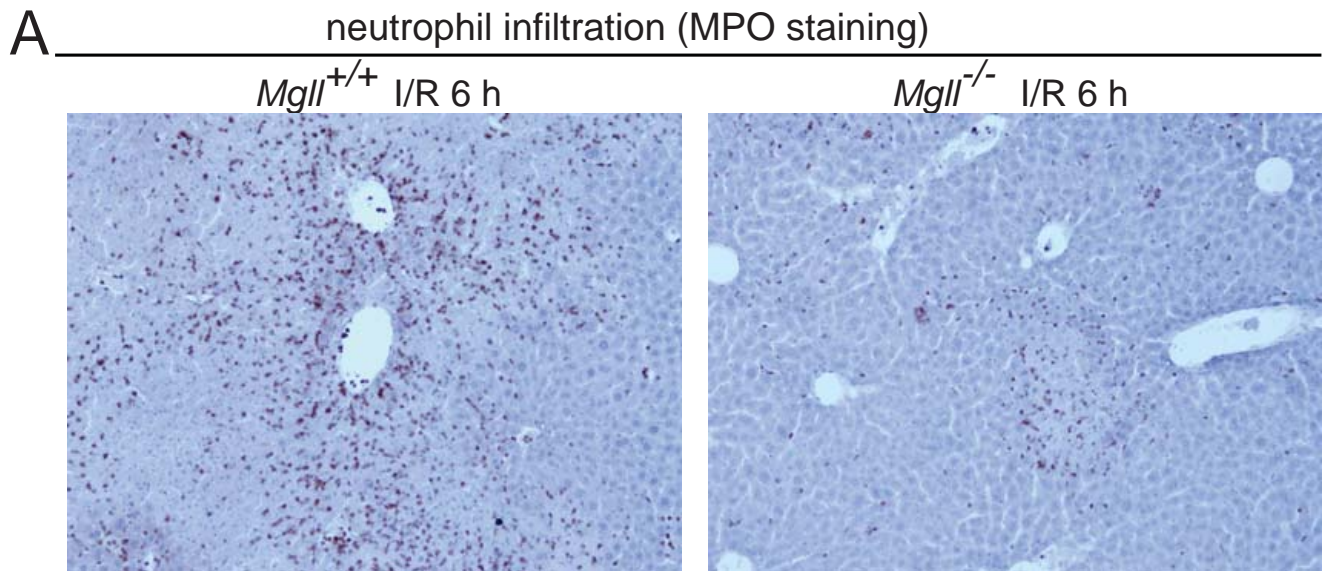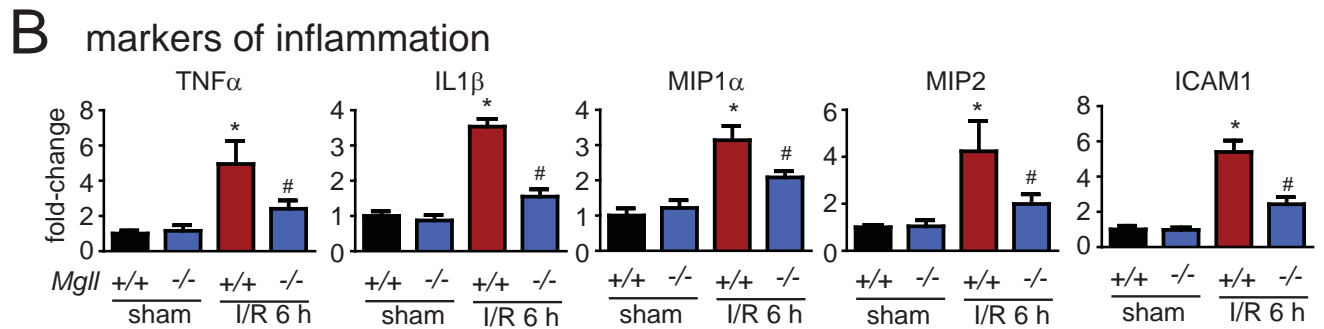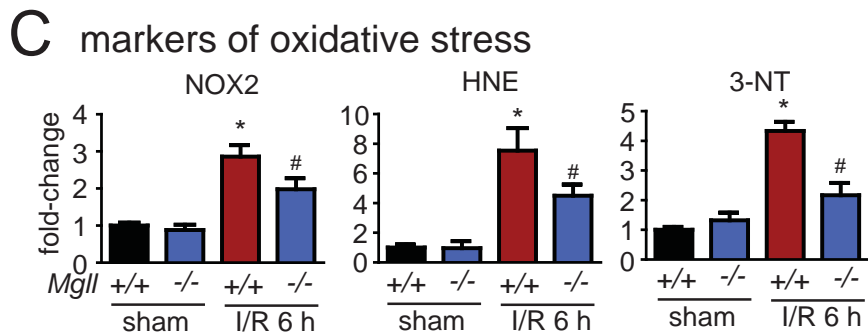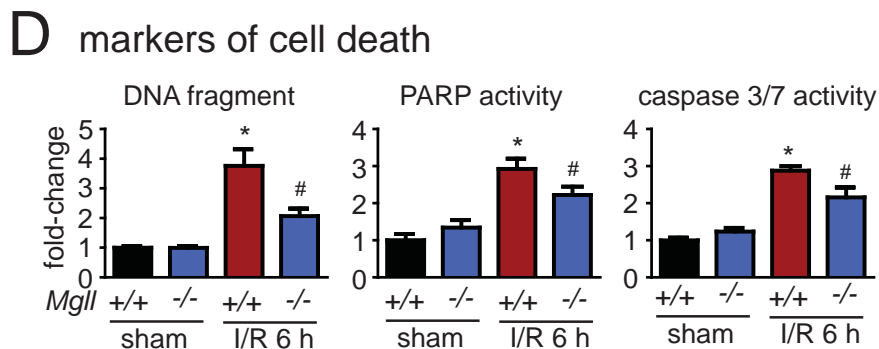

# Suppl. Figure 5

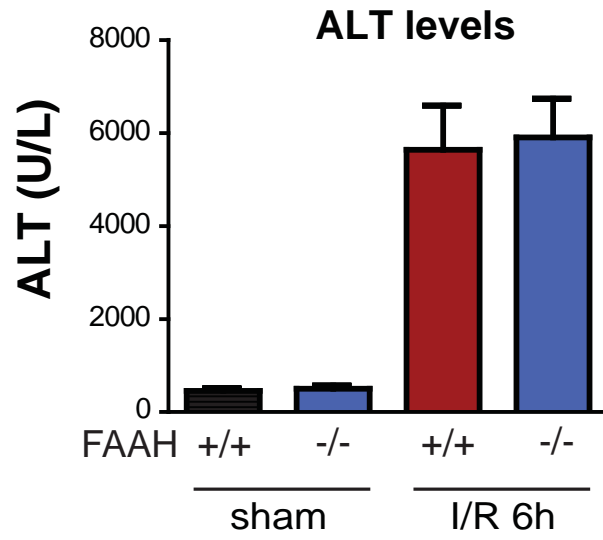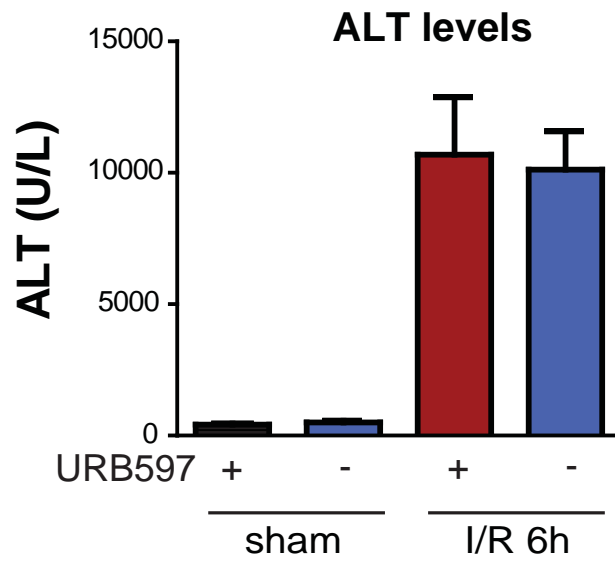

# Suppl Figure 6

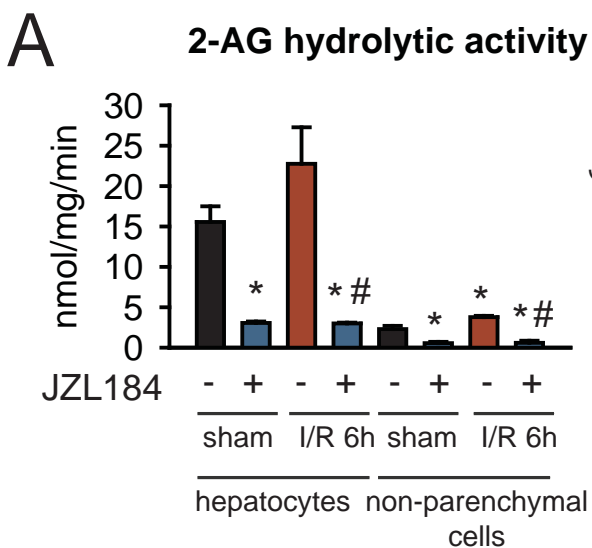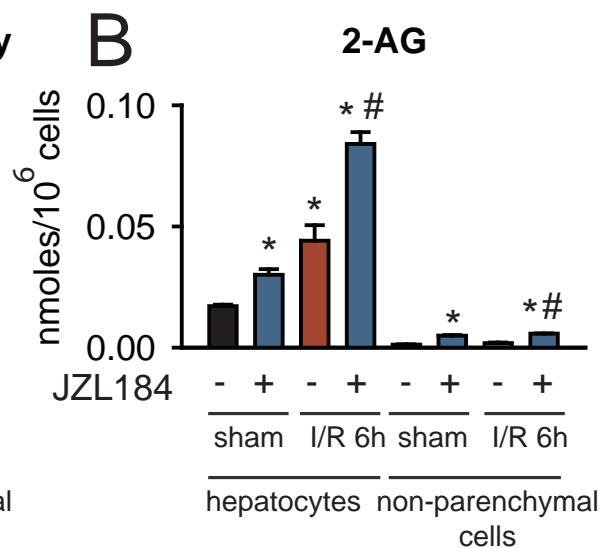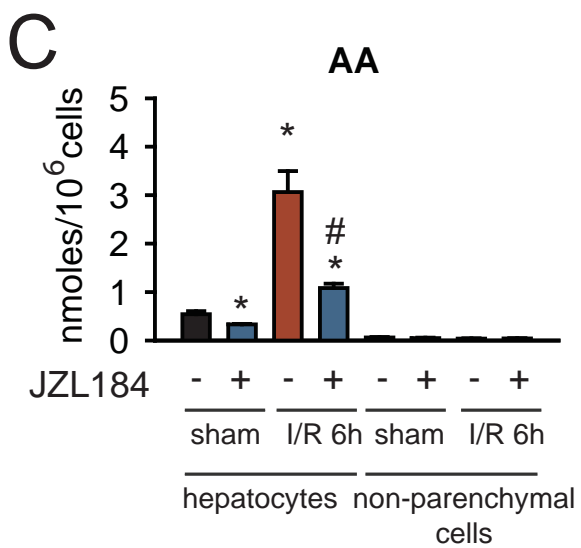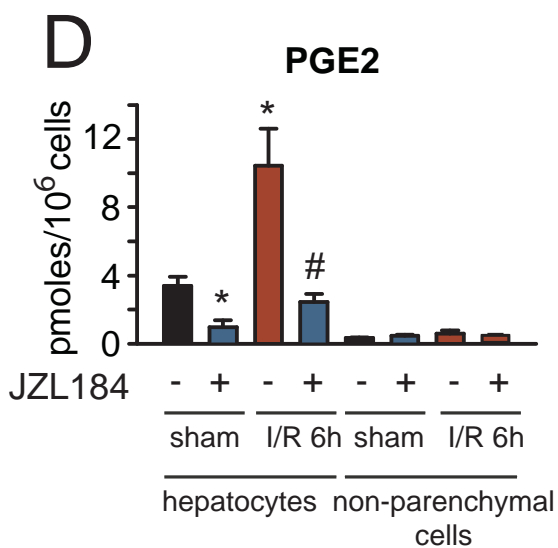

# Suppl. Figure 7

## Spleen

---- cells without antibody  
 — CB<sub>2</sub> antibody

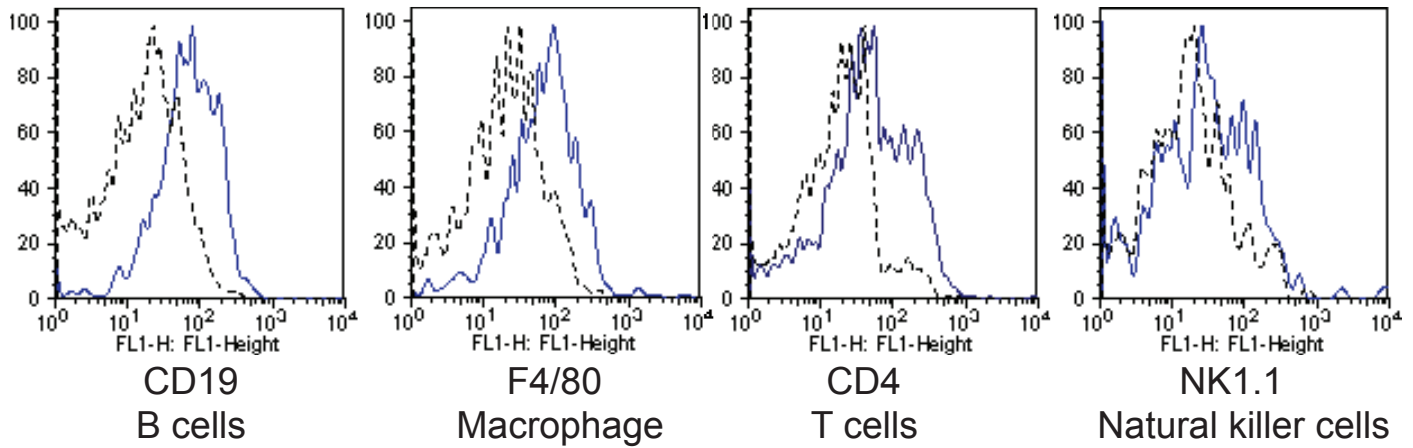

## Liver

---- cells without antibody    — sham CB<sub>2</sub> antibody  
 — 6h ischemia/reperfusion CB<sub>2</sub> antibody

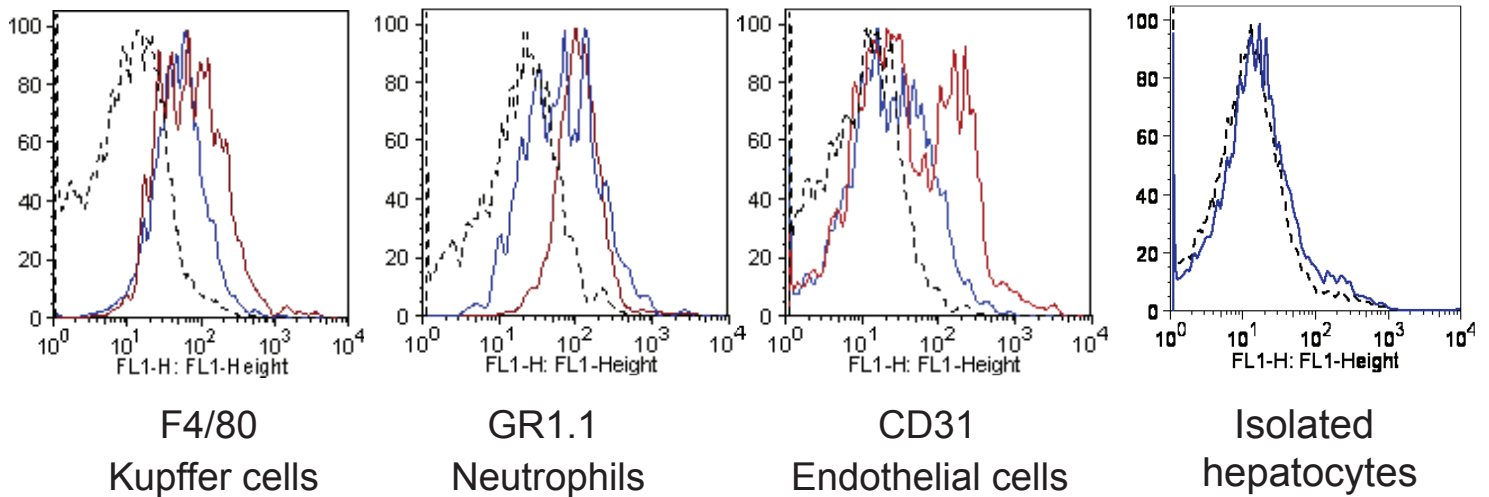

## CB2 mRNA

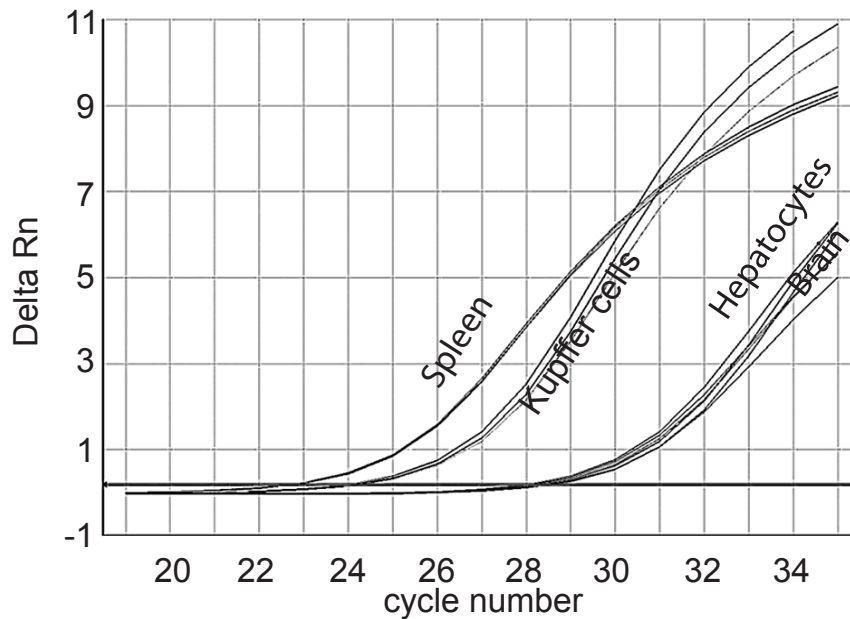

# Suppl. Figure 8

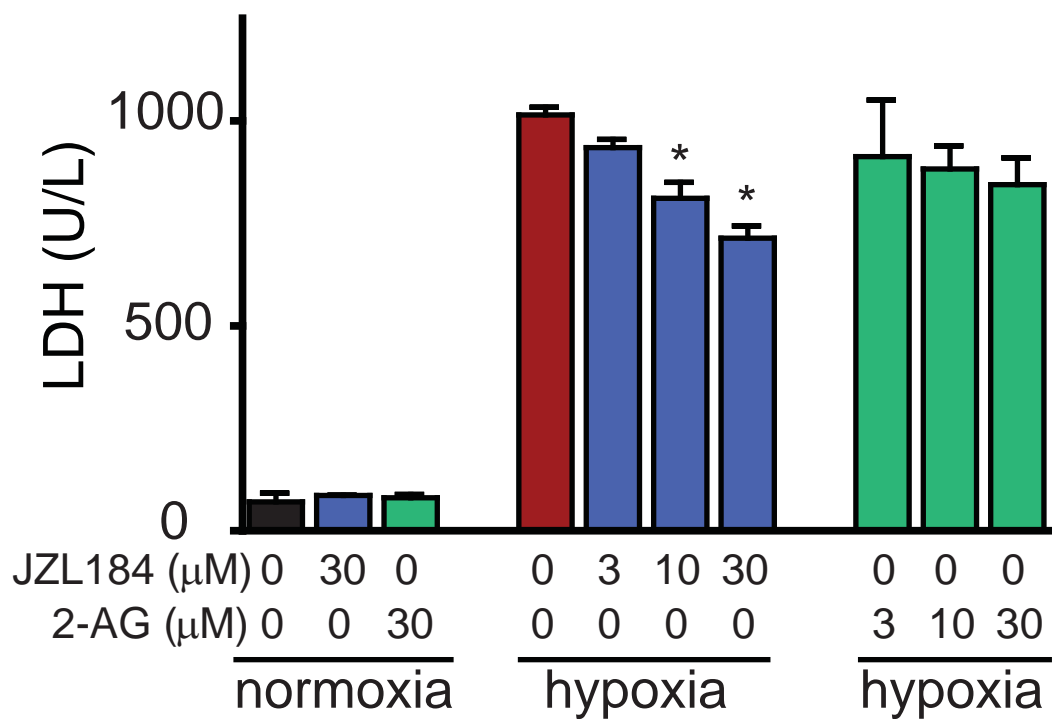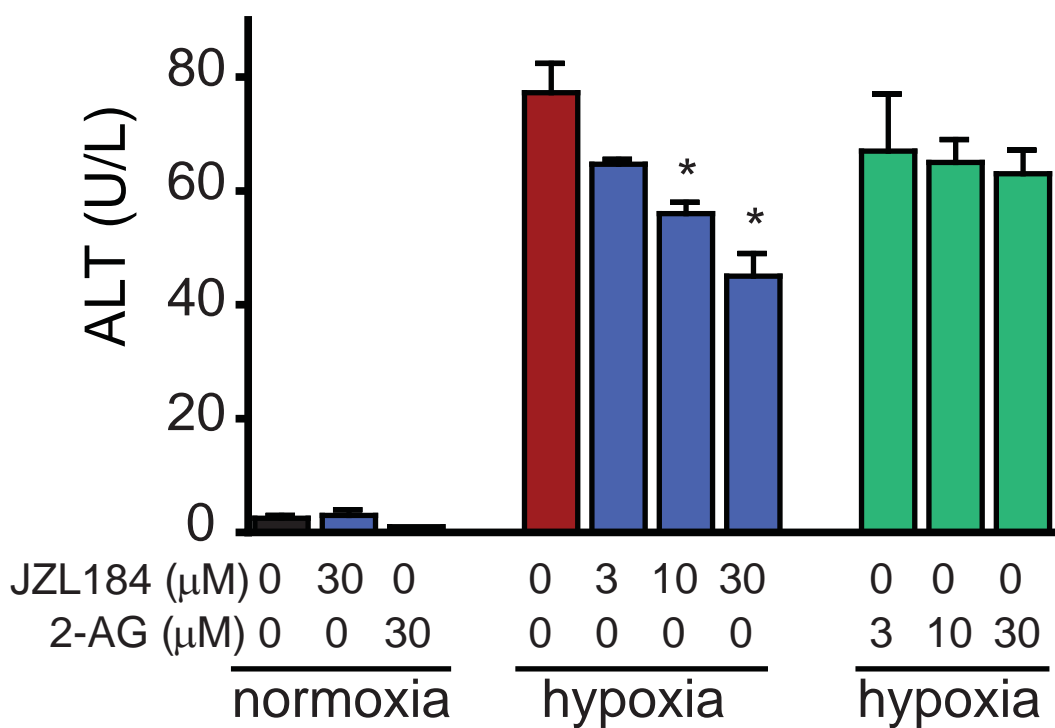



# Suppl. Figure 9

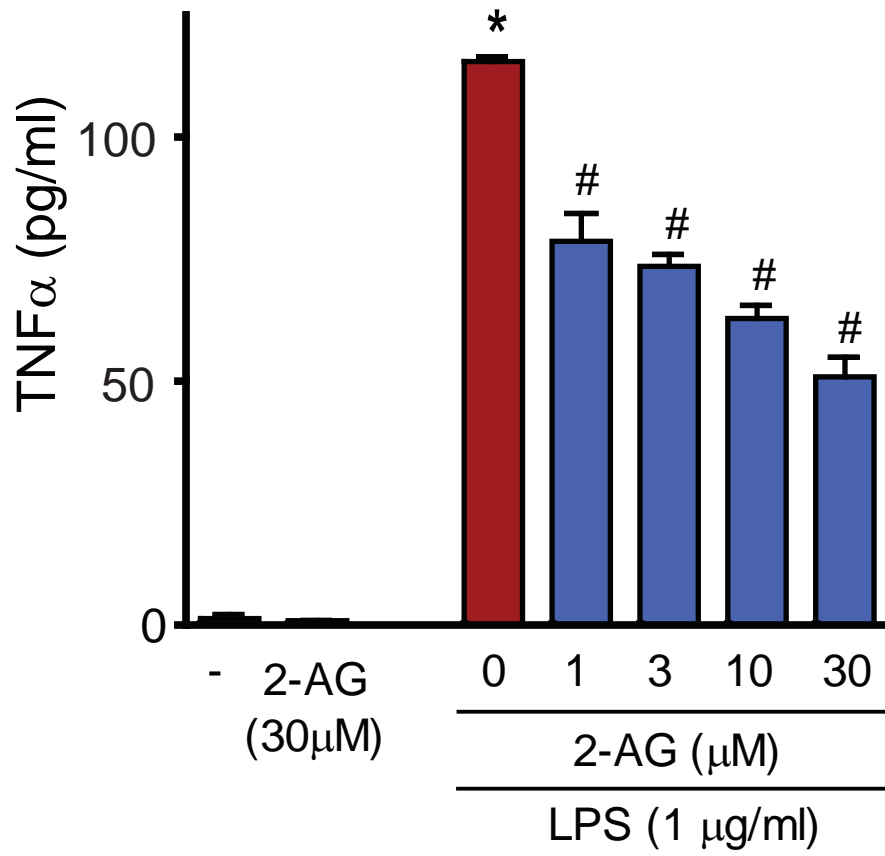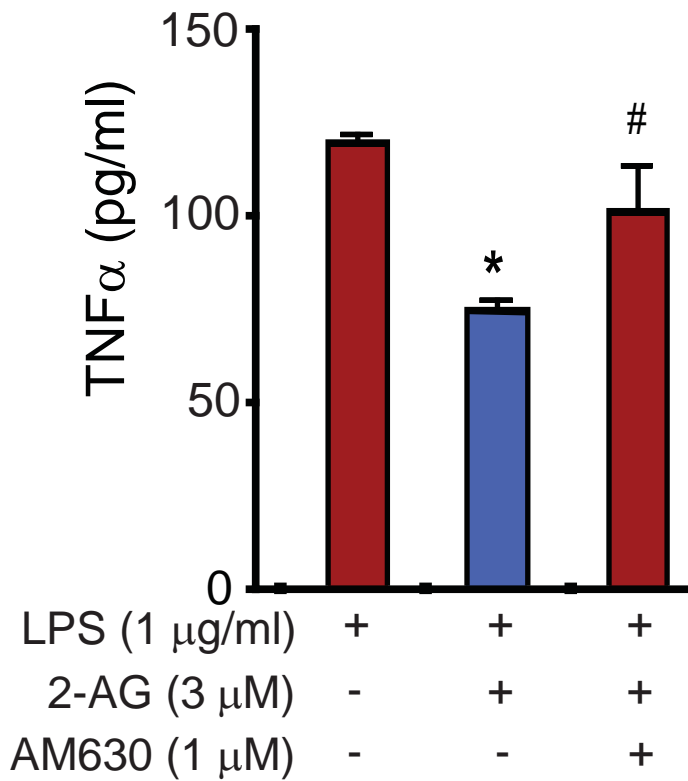

# Suppl. Figure 10

## A liver histology (H&E staining)

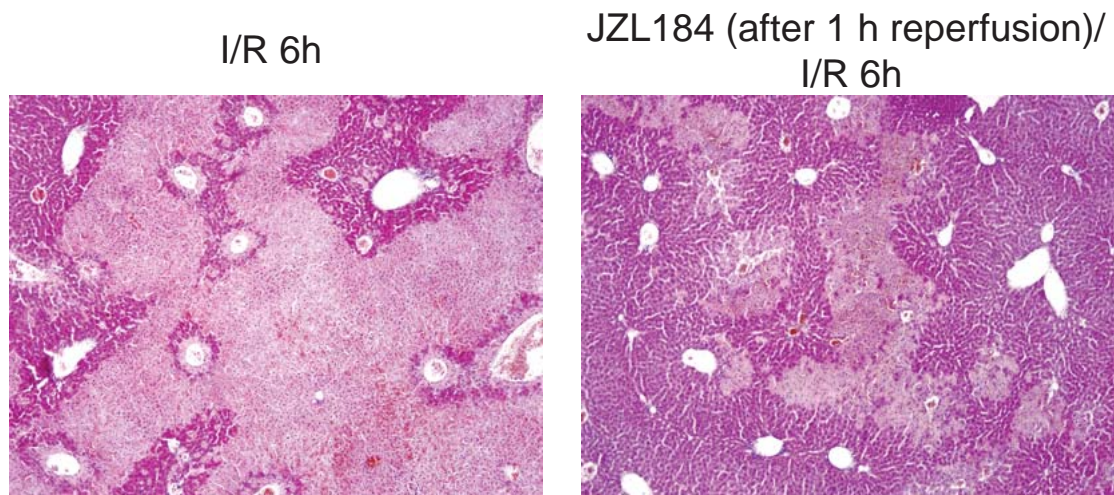

## B neutrophil infiltration (MPO staining)

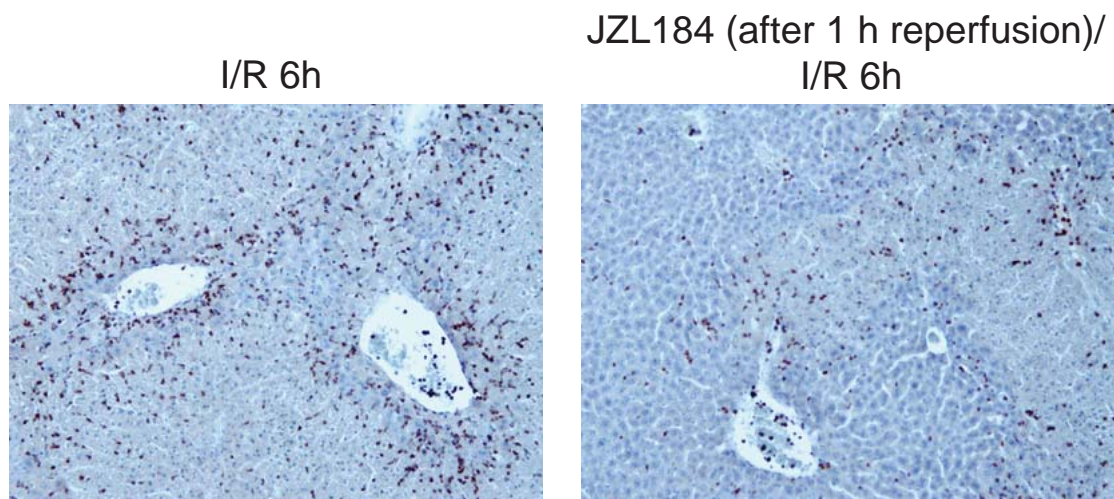

## C liver damage markers

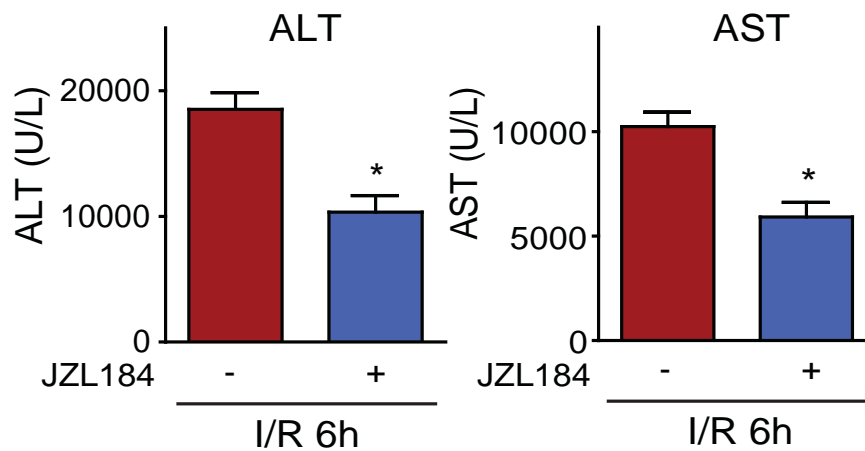

# Suppl. Figure 11

## A

1h post-reperfusion treatment (6 h of I/R)

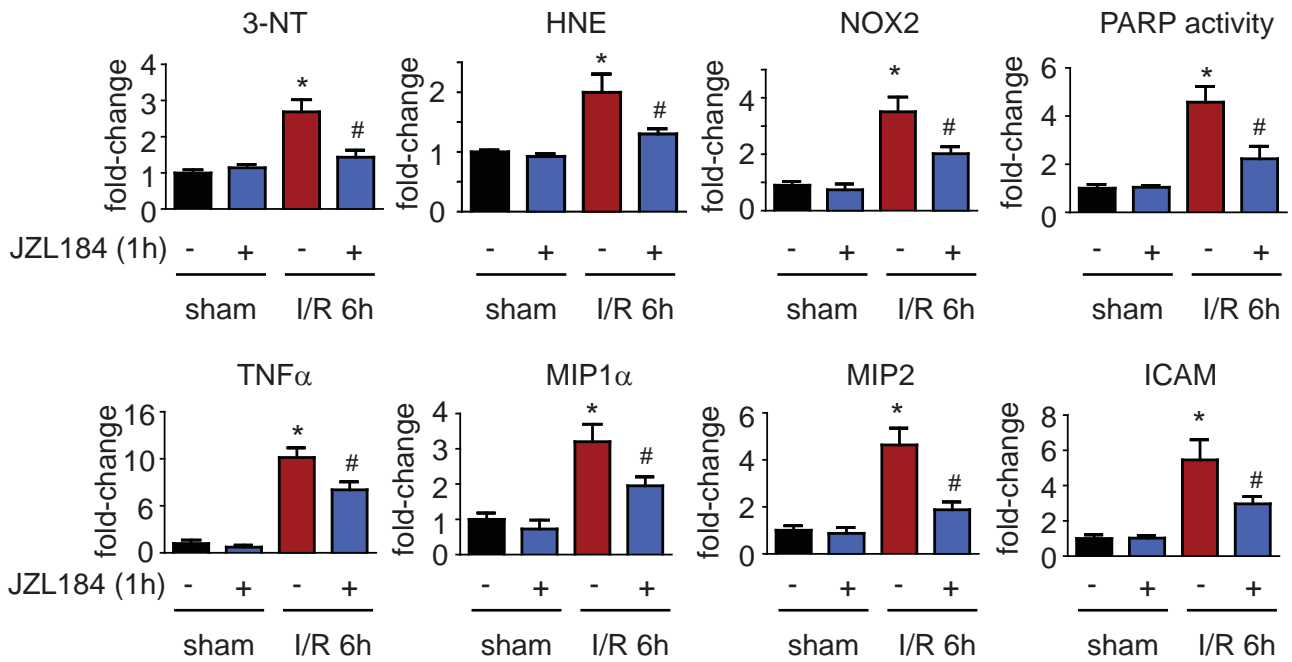

## B

3h post-reperfusion treatment of JZL184 (24h of I/R)

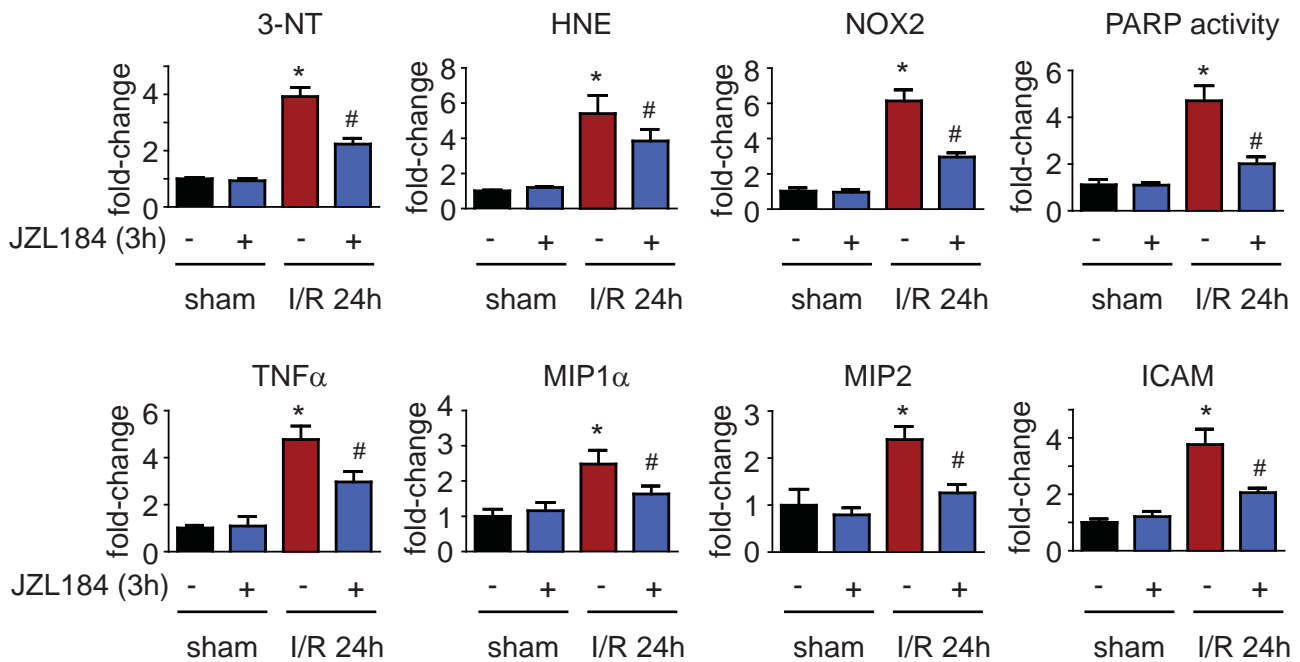

# Suppl. Figure 12

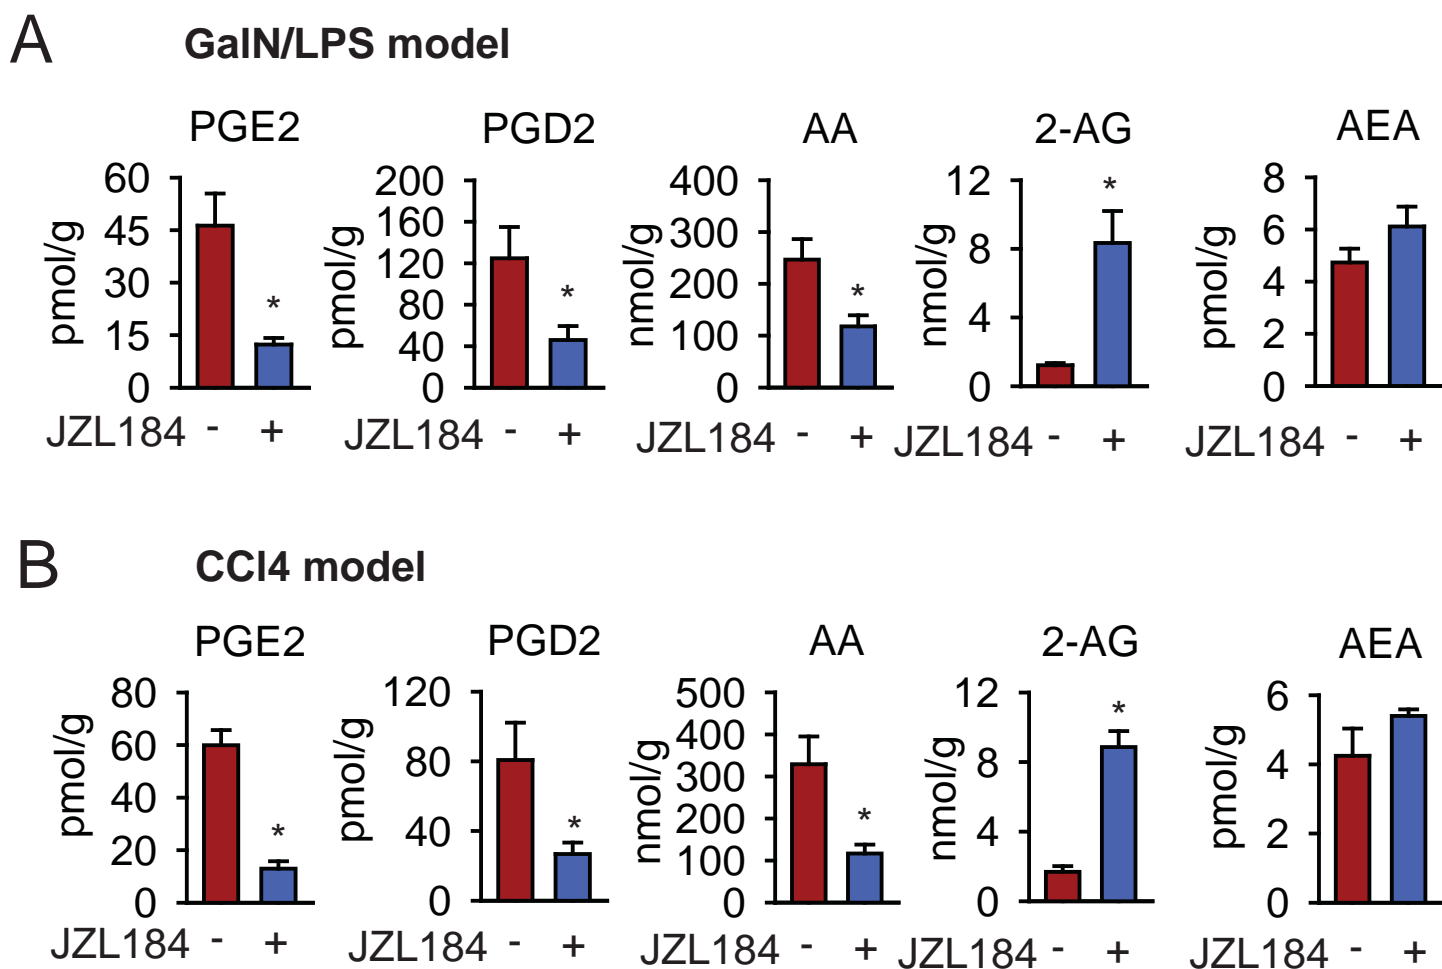

# Suppl. Figure 13

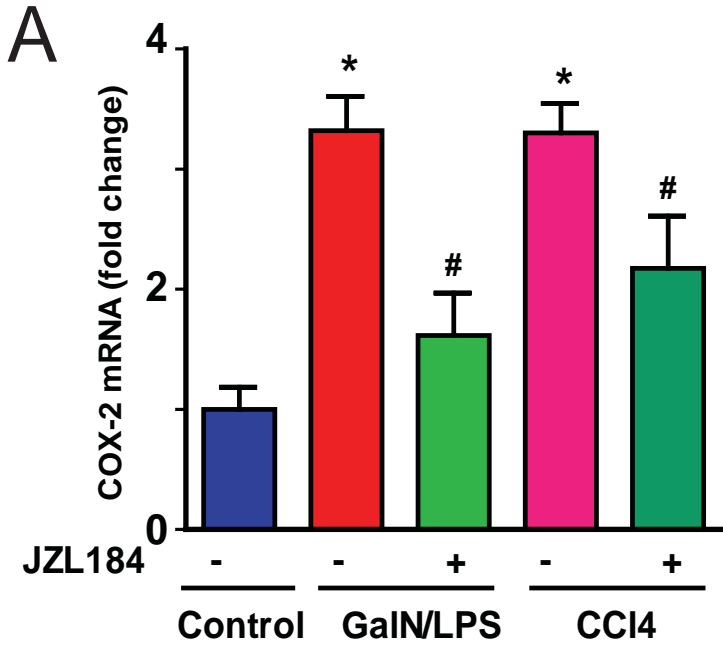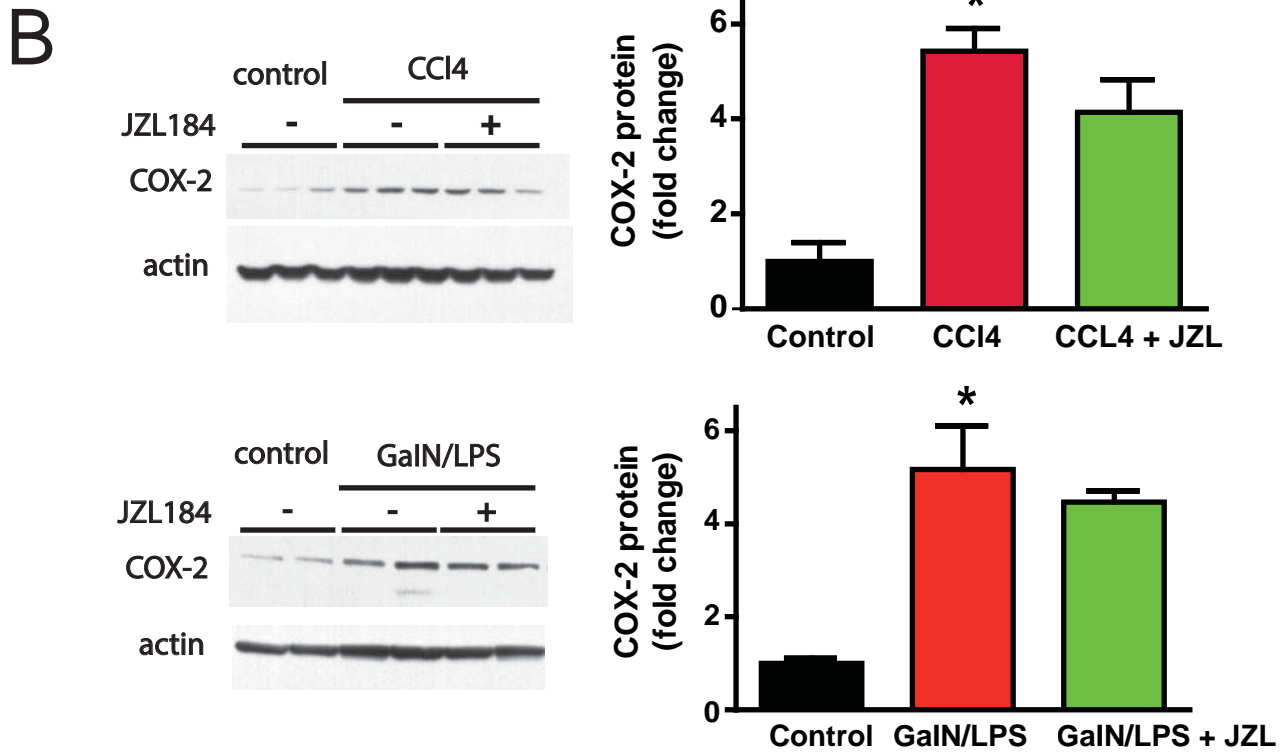

Supplement: NIHMS433189-supplement-01.pdf [file NIHMS433189-supplement-01.pdf]
